# Supplementary material
Source: publisher site journal article supplement (https://www.dovepress.com/article/408688)
Supplement: Supplementary file 1 [file get_supplementary_file.php]

# Comparative effectiveness of umeclidinium/vilanterol versus indacaterol/glycopyrronium on moderate-to-severe exacerbations in patients with chronic obstructive pulmonary disease in clinical practice in England

Gema Requena1, Alexandrosz Czira1*, Victoria Banks2*, Robert Wood2, Theo Tritton2, Catherine Castillo2, Jie Yeap2*, Rosie Wild2, Chris Compton1, Kieran J. Rothnie1, Felix JF Herth3,
Jennifer K. Quint4, Afisi S. Ismaila5,6

1GSK, R&D Global Medical, Brentford, Middlesex, UK

2Real-world Evidence,Adelphi Real World, Bollington, Cheshire, UK

3Department of Pneumology and Critical Care Medicine, Thoraxklinik, University of Heidelberg and Translational Lung Research Center Heidelberg, Heidelberg, Germany

4National Heart and Lung Institute, Imperial College London, London, UK

5Value Evidence and Outcomes, GSK, Collegeville, PA, USA

6Department of Health Research Methods, Evidence and Impact, McMaster University, Hamilton, ON, Canada

*At the time of the study

**Corresponding author:**

Name: Gema Requena Pharm D, MPH, PhD

Address: Epidemiology, Value Evidence and Outcomes, R&D Global Medical, GSK, Brentford, Middlesex, UK

Tel: +44 20 80476893

Email: [gema.x.requena@gsk.com](mailto:gema.x.requena@gsk.com)

**Target Journal:** International Journal of COPD

**Word count** **(no limit, but <3000 words recommended):** 3366

**Tables/figures limit**: No limit

**Supplementary materials**

**Supplementary Table 1.** Diagnoses considered incompatible with a COPD diagnosis

| **Code type** | **Medical code** | **Term** |
| --- | --- | --- |
| Medcode | 861421000006118 | Excision of lung/bronchus |
| Medcode | 90511000006115 | Transplantation of lung |
| Medcode | 861571000006118 | Lung transplant |
| Medcode | 458296015 | Excision of lung |
| Medcode | 219751000006114 | Pneumonectomy operations |
| Medcode | 90421000006112 | Transplantation of heart and lung |
| Medcode | 348550016 | Double lung transplant |
| Medcode | 348547019 | Single lung transplant |
| Medcode | 362091000000110 | Single lobe lung transplant |
| Medcode | 82944014 | Total pneumonectomy |
| Medcode | 82943015 | Pneumonectomy |
| Medcode | 268104016 | Bilobectomy of lung |
| Medcode | 268105015 | Lobectomy of lung |
| Medcode | 268106019 | Pulmonary lobectomy |
| Medcode | 268108018 | Excision of segment of lung |
| Medcode | 268107011 | Pulmonary segmentectomy |
| Medcode | 268109014 | Partial lobectomy of lung NEC |
| Medcode | 861581000006115 | Lung - segmental excision |
| Medcode | 1543291000006110 | Reduction of lung volume |
| Medcode | 268114013 | Open excision of lesion of lung |
| Medcode | 861601000006113 | Lung cyst removal |
| Medcode | 861611000006111 | Lung tumour excision |
| Medcode | 478111000006114 | Allotransplantation of heart and lung |
| Medcode | 270766014 | Revision of transplantation of heart and lung |
| Medcode | 909731000006117 | [RFC] Pulmonary fibrosis |
| Medcode | 1774621000006113 | Active on lung transplant waiting list |
| Medcode | 1834241000006116 | Age at diagnosis of cystic fibrosis - months |
| Medcode | 1834251000006119 | Age at diagnosis of cystic fibrosis - years |
| Medcode | 1708981000006119 | Annual cystic fibrosis blood test |
| Medcode | 1709161000006116 | Arthropathy in Cystic Fibrosis |
| Medcode | 1763641000006113 | Cirrhosis of liver due to cystic fibrosis |
| Medcode | 1709421000006118 | Complication of transplanted lung |
| Medcode | 1708971000006117 | Cystic fibrosis annual review |
| Medcode | 1834261000006117 | Cystic fibrosis complications at birth |
| Medcode | 1834271000006112 | Cystic fibrosis diagnosed following neonatal screening |
| Medcode | 1838061000006116 | Cystic fibrosis diagnosed following prenatal screening |
| Medcode | 1854811000006117 | Cystic fibrosis manifested by acute/persistent respiratory symp. |
| Medcode | 1854831000006111 | Cystic fibrosis manifested by bronchiectasis |
| Medcode | 1854841000006118 | Cystic fibrosis manifested by electrolyte imbalance |
| Medcode | 1854771000006117 | Cystic fibrosis manifested by failure to thrive |
| Medcode | 1854881000006112 | Cystic fibrosis manifested by intestinal obstruction |
| Medcode | 1854901000006114 | Cystic fibrosis manifested by malabsorption |
| Medcode | 1854851000006116 | Cystic fibrosis manifested by male infertility |
| Medcode | 1854861000006119 | Cystic fibrosis manifested by malnutrition |
| Medcode | 1854871000006114 | Cystic fibrosis manifested by meconium ileus |
| Medcode | 1854911000006112 | Cystic fibrosis manifested by nasal polyp/sinus disease |
| Medcode | 1854801000006115 | Cystic fibrosis manifested by pancreatitis |
| Medcode | 1854781000006119 | Cystic fibrosis manifested by rectal prolapse |
| Medcode | 1708961000006112 | Cystic fibrosis monitoring |
| Medcode | 1854791000006116 | Cystic fibrosis with liver manifestations |
| Medcode | 1854661000006115 | Date of cystic fibrosis diagnosis |
| Medcode | 1834351000006113 | Discussion about lung transplantation |
| Medcode | 1696341000006116 | Excision of bulla of lung |
| Medcode | 1759021000006116 | Interstitial lung disease due to collagen vascular disease |
| Medcode | 1709341000006117 | Liver disease due to cystic fibrosis |
| Medcode | 1834331000006118 | Local lung transplantation assessment done |
| Medcode | 1711511000006113 | Lung transplant evaluation |
| Medcode | 1711541000006112 | Lung transplant planned |
| Medcode | 1763661000006112 | Lung transplant waiting list patient status |
| Medcode | 1763651000006110 | Pancreatic sufficient cystic fibrosis |
| Medcode | 1763681000006119 | Provisionally accepted onto lung transplant waiting list |
| Medcode | 1762711000006110 | Reason for suspected cystic fibrosis diagnosis |
| Medcode | 1759011000006112 | Respiratory bronchiolitis associated interstitial lung disease |
| Medcode | 1772921000006111 | Restrictive lung disease due to kyphoscoliosis |
| Medcode | 1854691000006111 | Results annual cystic fibrosis assessment discussed with family |
| Medcode | 1728561000006113 | Seen in Cystic Fibrosis clinic |
| Medcode | 1776151000006115 | Staff group: Nursing - Community Cystic Fibrosis |
| Medcode | 1763691000006116 | Under care of lung transplant unit |
| Medcode | 1834341000006111 | Under regular review by lung transplant unit |
| Medcode | 254003016 | O/E - fibrosis of lung present |
| Medcode | 254002014 | O/E - fibrosis of lung |
| Medcode | 1148201000000111 | Cystic fibrosis monitoring |
| Medcode | 1148241000000114 | Cystic fibrosis annual review |
| Medcode | 2221211000000119 | Discussion about lung transplantation |
| Medcode | 933301000006118 | Excision of lung/bronchus |
| Medcode | 268099017 | Other specified transplantation of lung |
| Medcode | 268100013 | Transplantation of lung NOS |
| Medcode | 268110016 | Other specified excision of lung |
| Medcode | 268111017 | Excision of lung NOS |
| Medcode | 861591000006117 | Excision of lung/bronchus NOS |
| Medcode | 270767017 | Other specified transplantation of heart and lung |
| Medcode | 270768010 | Transplantation of heart and lung NOS |
| Medcode | 1753461000000111 | Lung transplant planned |
| Medcode | 1551091000000112 | Seen in cystic fibrosis clinic |
| Medcode | 149374011 | Tuberculous fibrosis of lung |
| Medcode | 494831000000119 | Cystic fibrosis related diabetes mellitus |
| Medcode | 293528019 | Cystic fibrosis |
| Medcode | 293530017 | Fibrocystic disease |
| Medcode | 293532013 | Mucoviscidosis |
| Medcode | 1495466012 | Cystic fibrosis with no meconium ileus |
| Medcode | 142759013 | Cystic fibrosis with meconium ileus |
| Medcode | 1495490013 | Meconium ileus in cystic fibrosis |
| Medcode | 606441000006110 | Cystic fibrosis with pulmonary manifestations |
| Medcode | 293537019 | Cystic fibrosis with intestinal manifestations |
| Medcode | 1174311000000111 | Arthropathy in cystic fibrosis |
| Medcode | 1174361000000113 | Cystic fibrosis with distal intestinal obstruction syndrome |
| Medcode | 1174401000000116 | Fibrosing colonopathy |
| Medcode | 2675247013 | Liver disease due to cystic fibrosis |
| Medcode | 1736361000000112 | Cystic fibrosis related cirrhosis |
| Medcode | 2222561000000111 | Exacerbation of cystic fibrosis |
| Medcode | 451084014 | Cystic fibrosis with other manifestations |
| Medcode | 1227346010 | Cystic fibrosis with combined manifestations |
| Medcode | 293539016 | Cystic fibrosis NOS |
| Medcode | 178500017 | Extrinsic allergic alveolitis |
| Medcode | 189221016 | Hypersensitivity pneumonitis |
| Medcode | 31510012 | Farmers' lung |
| Medcode | 111723011 | Bagassosis |
| Medcode | 1233152013 | Bird-fancier's lung |
| Medcode | 20833017 | Budgerigar-fanciers' lung |
| Medcode | 141566014 | Pigeon-fanciers' lung |
| Medcode | 301527019 | Bird-fancier's lung NOS |
| Medcode | 124281000006119 | Suberosis (cork-handlers' lung) |
| Medcode | 1224939016 | Malt workers' lung |
| Medcode | 87088014 | Mushroom workers' lung |
| Medcode | 1235159019 | Maple bark strippers' lung |
| Medcode | 291961000006112 | Ventilation' pneumonitis |
| Medcode | 301528012 | Other allergic alveolitis |
| Medcode | 2156690018 | Cheese-washers' lung |
| Medcode | 28128015 | Coffee-workers' lung |
| Medcode | 121968010 | Fish-meal workers' lung |
| Medcode | 113506011 | Furriers' lung |
| Medcode | 32511014 | Grain-handlers' disease |
| Medcode | 301529016 | Pituitary snuff-takers' disease |
| Medcode | 149741000006116 | Sequoiosis (red-cedar asthma) |
| Medcode | 94731013 | Wood asthma |
| Medcode | 301530014 | Air-conditioner and humidifier lung |
| Medcode | 301531013 | Other allergic alveolitis NOS |
| Medcode | 477131000006116 | Allergic alveolitis and pneumonitis NOS |
| Medcode | 301533011 | Allergic extrinsic alveolitis NOS |
| Medcode | 301534017 | Hypersensitivity pneumonitis NOS |
| Medcode | 301532018 | Allergic alveolitis and pneumonitis NOS |
| Medcode | 301557011 | Pneumoconiosis due to other inorganic dust |
| Medcode | 150191018 | Aluminosis of lung |
| Medcode | 24973018 | Bauxite fibrosis of lung |
| Medcode | 14610012 | Berylliosis |
| Medcode | 29395011 | Graphite fibrosis of lung |
| Medcode | 499259012 | Siderosis |
| Medcode | 85415012 | Stannosis |
| Medcode | 301558018 | Pneumoconiosis due to inorganic dust NOS |
| Medcode | 301575012 | Chronic pulmonary fibrosis due to chemical fumes |
| Medcode | 350255018 | Progressive massive fibrosis |
| Medcode | 301609011 | Chronic pulmonary radiation disease |
| Medcode | 556271000006115 | Chronic pulmonary fibrosis following radiation |
| Medcode | 885431000006115 | Radiation lung fibrosis |
| Medcode | 301610018 | Chronic pulmonary radiation disease NOS |
| Medcode | 301611019 | Drug-induced interstitial lung disorders |
| Medcode | 301612014 | Acute drug-induced interstitial lung disorders |
| Medcode | 301613016 | Chronic drug-induced interstitial lung disorders |
| Medcode | 211391000006118 | Post inflammatory pulmonary fibrosis |
| Medcode | 85961019 | Cirrhosis of lung |
| Medcode | 75302014 | Idiopathic fibrosing alveolitis |
| Medcode | 815341000006115 | Hamman - Rich syndrome |
| Medcode | 196654011 | Cryptogenic fibrosing alveolitis |
| Medcode | 1786131000006116 | Idiopathic pulmonary fibrosis |
| Medcode | 885481000006119 | Idiopathic fibrosing alveolitis |
| Medcode | 301705013 | Alveolar capillary block |
| Medcode | 621121000006112 | Diffuse pulmonary fibrosis |
| Medcode | 885491000006116 | Pulmonary fibrosis |
| Medcode | 85960018 | Pulmonary fibrosis |
| Medcode | 2475606014 | Usual interstitial pneumonitis |
| Medcode | 301709019 | Idiopathic fibrosing alveolitis NOS |
| Medcode | 301714015 | Lung involvement in diseases EC |
| Medcode | 162301000006117 | Rheumatoid lung |
| Medcode | 13455018 | Rheumatic pneumonia |
| Medcode | 301716018 | Lung disease with systemic sclerosis |
| Medcode | 732581000006115 | Lung disease with diseases EC |
| Medcode | 301718017 | Pulmonary amyloidosis |
| Medcode | 301719013 | Lung disease with polymyositis |
| Medcode | 40879015 | Pulmonary sarcoidosis |
| Medcode | 301720019 | Lung disease with Sjogren's disease |
| Medcode | 301721015 | Lung disease with systemic lupus erythematosus |
| Medcode | 732621000006115 | Lung disease with syphilis |
| Medcode | 301723017 | Lung disease with diseases EC NOS |
| Medcode | 116128010 | Broncholithiasis |
| Medcode | 18344016 | Calcification of lung |
| Medcode | 193321000006116 | Pulmolithiasis |
| Medcode | 301758015 | Interstitial lung disease NEC |
| Medcode | 456846015 | Squamous metaplasia of lung |
| Medcode | 1786171000006118 | Respiratory bronchiolitis associated interstitial lung dis |
| Medcode | 2676188013 | Interstitial lung disease due to collagen vascular disease |
| Medcode | 1747711000000111 | Interstitial lung disease due to connective tissue disease |
| Medcode | 301841015 | [X]Hypersensitivity pneumonitis due to other organic dusts |
| Medcode | 413231000006111 | [X]Other resp diseases principally affecting interstitium |
| Medcode | 301852014 | [X]Other interstitial pulmonary diseases with fibrosis |
| Medcode | 301853016 | [X]Other specified interstitial pulmonary diseases |
| Medcode | 2474731013 | [X]Hepatopulmonary syndrome |
| Medcode | 311496011 | Fibrosing alveolitis associated with rheumatoid arthritis |
| Medcode | 144462013 | Congenital cystic lung |
| Medcode | 313655010 | Congenital cystic lung disease, unspecified |
| Medcode | 507420017 | Congenital polycystic lung |
| Medcode | 411496010 | Multiple lung cysts |
| Medcode | 507421018 | Multiple congenital bronchogenic cysts |
| Medcode | 98257019 | Congenital honeycomb lung |
| Medcode | 400818016 | Single lung cyst |
| Medcode | 411495014 | Lung cyst |
| Medcode | 400819012 | Congenital bronchogenic cyst |
| Medcode | 1219630019 | Congenital cystic adenomatoid malformation of the lung |
| Medcode | 313664017 | Other specified congenital cystic lung |
| Medcode | 313665016 | Congenital cystic lung NOS |
| Medcode | 313666015 | Lung agenesis, hypoplasia and dysplasia |
| Medcode | 893011000006116 | Pulmonary agenesis |
| Medcode | 500437014 | Aplasia of lung |
| Medcode | 788641000006115 | Hypoplasia of lung |
| Medcode | 1222144014 | Sequestration of lung |
| Medcode | 500438016 | Agenesis of lung |
| Medcode | 110473015 | Congenital absence of lung |
| Medcode | 313670011 | Congenital absence of lung fissures |
| Medcode | 26419015 | lung fissure |
| Medcode | 313671010 | Agenesis of lung NOS |
| Medcode | 313672015 | Other specified lung agenesis, hypoplasia or dysplasia |
| Medcode | 313673013 | Fusion of lobes of lung |
| Medcode | 313674019 | Other lung agenesis, hypoplasia or dysplasia NOS |
| Medcode | 313675018 | Lung agenesis, hypoplasia or dysplasia NOS |
| Medcode | 313676017 | Other lung anomalies |
| Medcode | 313677014 | Anomaly of lung, unspecified |
| Medcode | 128792019 | Congenital bronchiectasis |
| Medcode | 87505015 | Accessory lung |
| Medcode | 30089017 | Azygos lobe of lung |
| Medcode | 3936010 | Accessory lobe of lung |
| Medcode | 221881000000112 | Ectopic tissues in lung |
| Medcode | 377813018 | Ectopic bone and cartilage in lung |
| Medcode | 1659531000006118 | [X]Primary ciliary dyskinesia |
| Medcode | 324975010 | Heart-lung transplant failure and rejection |
| Medcode | 73655011 | Complication of transplanted lung |
| Medcode | 460650019 | [V]Lung transplanted |
| Medcode | 460955014 | [V]Heart and lungs transplant status |
| Medcode | 461136018 | [V]Acquired absence of part of lung |
| ICD–10 | Z94.2 | Lung transplant status |
| ICD–10 | Z94.3 | Heart and lungs transplant status |
| ICD–10 | T86.3 | Heart-lung transplant failure and rejection |
| ICD–10 | Z90.2 | Acquired absence of lung [part of] |
| ICD–10 | Q33.0 | Congenital cystic lung |
| ICD–10 | Q33.1 | Accessory lobe of lung |
| ICD–10 | Q33.2 | Sequestration of lung |
| ICD–10 | Q33.3 | Agenesis of lung |
| ICD–10 | Q33.4 | Congenital bronchiectasis |
| ICD–10 | Q33.5 | Ectopic tissue in lung |
| ICD–10 | Q33.6 | Hypoplasia and dysplasia of lung |
| ICD–10 | Q33.8 | Other congenital malformations of lung |
| ICD–10 | Q33.9 | Congenital malformation of lung, unspecified |
| ICD–10 | J63.1 | Bauxite fibrosis (of lung) |
| ICD–10 | J63.3 | Graphite fibrosis (of lung) |
| ICD–10 | J84.1 | Other interstitial pulmonary diseases with fibrosis |
| ICD–10 | J63.0 | Aluminosis (of lung) |
| ICD–10 | J63.2 | Berylliosis |
| ICD–10 | J63.4 | Siderosis |
| ICD–10 | J63.5 | Stannosis |
| ICD–10 | J63.8 | Pneumoconiosis due to other specified inorganic dusts |
| ICD–10 | E84 | Cystic fibrosis |
| ICD–10 | E84.0 | Cystic fibrosis with pulmonary manifestations |
| ICD–10 | E84.1 | Cystic fibrosis with intestinal manifestations |
| ICD–10 | E84.8 | Cystic fibrosis with other manifestations |
| ICD–10 | E84.9 | Cystic fibrosis, unspecified |
| ICD–10 | J67.0 | Farmer lung |
| ICD–10 | J60 | Coalworker pneumoconiosis |
| ICD–10 | J61 | Pneumoconiosis due to asbestos and other mineral fibers |
| ICD–10 | J62 | Pneumoconiosis due to dust containing silica |
| ICD–10 | J62.0 | Pneumoconiosis due to talc dust |
| ICD–10 | J62.8 | Pneumoconiosis due to other dust containing silica |
| ICD–10 | J64 | Unspecified pneumoconiosis |
| ICD–10 | J65 | Pneumoconiosis associated with tuberculosis |
| ICD–10 | P75* | Meconium ileus in cystic fibrosis |
| ICD–10 | J84.8 | Other specified interstitial pulmonary diseases |
| ICD–10 | J84.9 | Interstitial pulmonary disease, unspecified |
| ICD–10 | J70.4 | Drug-induced interstitial lung disorders, unspecified |
| ICD–10 | J70.2 | Acute drug-induced interstitial lung disorders |
| ICD–10 | J70.3 | Chronic drug-induced interstitial lung disorders |
| ICD–10 | M05.1 | Rheumatoid lung disease |
| ICD–10 | J99.0 | Rheumatoid lung disease |
| ICD–10 | J67 | Hypersensitivity pneumonitis due to organic dust |
| ICD–10 | J67.4 | Maltworker lung |
| ICD–10 | J67.6 | Maple-bark-stripper lung |
| ICD–10 | J67.7 | Air-conditioner and humidifier lung |
| ICD–10 | J67.8 | Hypersensitivity pneumonitis due to other organic dusts |
| ICD–10 | J67.9 | Hypersensitivity pneumonitis due to unspecified organic dust |
| ICD–10 | J67.1 | Bagassosis |
| ICD–10 | J67.2 | Bird fancier lung |
| ICD–10 | J67.3 | Suberosis |
| ICD–10 | J67.5 | Mushroom-worker lung |
| ICD–10 | J68.4 | Chronic respiratory conditions due to chemicals, gases, fumes and vapors |
| ICD–10 | J70.0 | Acute pulmonary manifestations due to radiation |
| ICD–10 | J70.1 | Chronic and other pulmonary manifestations due to radiation |
| ICD–10 | E85.4 | Organ-limited amyloidosis |
| ICD–10 | D86.0 | Sarcoidosis of lung |
| ICD–10 | D86.2 | Sarcoidosis of lung with sarcoidosis of lymph nodes |
| ICD–10 | M35.0 | Sicca syndrome [Sjögren] |
| ICD–10 | M32.1 | Systemic lupus erythematosus with organ or system involvement |
| ICD–10 | A52.7 | Other symptomatic late syphilis |
| ICD–10 | J98.0 | Diseases of bronchus, not elsewhere classified |
| ICD–10 | A16.4 | Tuberculosis of larynx, trachea and bronchus, without mention of bacteriological or histological confirmation |
| ICD–10 | A15.5 | Tuberculosis of larynx, trachea and bronchus, confirmed bacteriologically and histologically |
| ICD–10 | [M05.1†](https://icd.who.int/browse10/2016/en#/J99.0) | Rheumatoid lung disease (J99.0*) |
| ICD–10 | J99.0* | Rheumatoid lung disease |
| ICD–10 | J63 | Pneumoconiosis due to other inorganic dusts |
| ICD–10 | J66 | Airway disease due to specific organic dust |
| ICD–10 | P27.1 | Bronchopulmonary dysplasia originating in the perinatal period |
| ICD–10 | Q25.7 | Other congenital malformations of pulmonary |
| ICD–10 | Q34 | Other congenital malformations of respiratory system |
| ICD–10 | Q34.8 | Other specified congenital malformations of respiratory system |
| ICD–10 | Q34.9 | Congenital malformation of respiratory system, unspecified |
| ICD–10 | K22.4 | Dyskinesia of esophagus |
| ICD–10 | Q33 | Congenital malformations of lung |
| OPCS | E53.1 | Double lung transplant |
| OPCS | E53.2 | Single lung transplant |
| OPCS | E53.3 | Single lobe lung transplant |
| OPCS | E53.8 | Other specified transplantation of lung |
| OPCS | E53.9 | Unspecified transplantation of lung |
| OPCS | E54.1 | Total pneumonectomy |
| OPCS | E54.2 | Bilobectomy of lung |
| OPCS | E54.3 | Lobectomy of lung |
| OPCS | E54.4 | Excision of segment of lung |
| OPCS | E54.5 | Partial lobectomy of lung NEC |
| OPCS | E54.8 | Other specified excision of lung |
| OPCS | E54.9 | Unspecified excision of lung |
| OPCS | K01.1 | Allotransplantation of heart and lung |
| OPCS | K01.2 | Revision of transplantation of heart and lung |
| OPCS | K01.8 | Other specified transplantation of heart and lung |
| OPCS | K01.9 | Unspecified transplantation of heart and lung |
| OPCS | X45.3 | Donation of lobe of lung |

CPRD, Clinical Practice Research Datalink; HES, Hospital Episode Statistics; OPCS, Office of Population Censuses and Surveys

**Supplementary Table 2.** On-treatment sensitivity analyses for all outcomes

|  | **Unweighted** | | | **Weighted** | | |
| --- | --- | --- | --- | --- | --- | --- |
| **Sensitivity analysis** | **Rate ratio** | **95% CI** | **p-value** | **Rate ratio** | **95% CI** | **p-value** |
| **Moderate-to-severe exacerbation** |  |  |  |  |  |  |
| 6 months | 0.78 | 0.68, 0.89 | 0.0003 | 0.93 | 0.80, 1.08 | 0.3329 |
| 12 months | 0.86 | 0.76, 0.96 | 0.0100 | 1.01 | 0.88, 1.17 | 0.8378 |
| 18 months | 0.84 | 0.75, 0.86 | 0.0012 | 0.98 | 0.86, 1.11 | 0.7152 |
| 24 months | 0.85 | 0.77, 0.95 | 0.0031 | 0.99 | 0.87, 1.12 | 0.8931 |
| **Moderate exacerbation** |  |  |  |  |  |  |
| 6 months | 0.89 | 0.76, 1.04 | 0.1446 | 1.03 | 0.86, 1.23 | 0.7263 |
| 12 months | 0.93 | 0.82, 1.06 | 0.2963 | 1.07 | 0.91, 1.26 | 0.4168 |
| 18 months | 0.94 | 0.81, 1.10 | 0.4622 | 1.08 | 0.90, 1.30 | 0.4171 |
| 24 months | 0.95 | 0.82, 1.11 | 0.5196 | 1.07 | 0.90, 1.28 | 0.4508 |
| **Severe exacerbation** |  |  |  |  |  |  |
| 6 months | 0.58 | 0.45, 0.74 | <0.0001 | 0.73 | 0.56, 0.97 | 0.0269 |
| 12 months | 0.68 | 0.54, 0.84 | 0.0004 | 0.88 | 0.68, 1.14 | 0.3151 |
| 18 months | 0.71 | 0.58, 0.87 | 0.0012 | 0.92 | 0.72, 1.17 | 0.4734 |
| 24 months | 0.73 | 0.59, 0.89 | 0.0024 | 0.94 | 0.74, 1.20 | 0.6070 |
| **Time-to-first exacerbation** |  |  |  |  |  |  |
| Moderate-to-severe | 0.90 | 0.83, 0.97 | 0.0083 | 1.00 | 0.92, 1.09 | 0.9695 |
| Moderate | 0.94 | 0.86, 1.03 | 0.1946 | 1.03 | 0.93, 1.14 | 0.5594 |
| Severe | 0.82 | 0.72, 0.93 | 0.0019 | 0.94 | 0.81, 1.08 | 0.3674 |
| **COPD-related HCRUa** |  |  |  |  |  |  |
| Number of prescriptions | 0.97 | 0.95, 1.00 | 0.0416 | 1.01 | 0.98, 1.04 | 0.4651 |
| Number of GP consultations | 0.95 | 0.88, 1.01 | 0.0986 | 0.99 | 0.92, 1.06 | 0.6878 |
| Number of inpatient stays | 0.51 | 0.39, 0.67 | <0.0001 | 0.68 | 0.49, 0.94 | 0.0212 |
| Number of A&E visits | 0.53 | 0.27, 1.01 | 0.0526 | 1.09 | 0.64, 1.84 | 0.7528 |
| **All-cause HCRUa** |  |  |  |  |  |  |
| Number of prescriptions | 0.92 | 0.85, 0.99 | 0.0300 | 1.01 | 0.93, 1.10 | 0.8390 |
| Number of consultations | 0.99 | 0.94, 1.05 | 0.7969 | 1.01 | 0.95, 1.08 | 0.7383 |
| Number of inpatient stays | 0.81 | 0.67, 0.98 | 0.0338 | 0.92 | 0.75, 1.12 | 0.4032 |
| Number of A&E visits | 0.78 | 0.60, 1.02 | 0.0672 | 0.96 | 0.77, 1.19 | 0.7014 |
| **COPD-related medical costsa** |  |  |  |  |  |  |
| Number of prescriptions | 0.84 | 0.70, 1.01 | 0.0671 | 0.83 | 0.68, 0.99 | 0.0441 |
| Number of consultations | 0.83 | 0.71, 0.97 | 0.0179 | 0.83 | 0.70, 0.99 | 0.0329 |
| Number of inpatient stays | 0.59 | 0.39, 0.89 | 0.0121 | 0.74 | 0.47, 1.16 | 0.1914 |
| Number of A&E visits | 0.63 | 0.36, 1.10 | 0.1021 | 1.10 | 0.66, 1.85 | 0.7096 |
| **All-cause medical costsa** |  |  |  |  |  |  |
| Number of prescriptions | 0.88 | 0.78, 1.01 | 0.0618 | 0.89 | 0.78, 1.01 | 0.0659 |
| Number of GP consultations | 0.97 | 0.91, 1.04 | 0.3800 | 0.97 | 0.91, 1.05 | 0.4669 |
| Number of inpatient stays | 0.66 | 0.52, 0.83 | 0.0004 | 0.71 | 0.55, 0.91 | 0.0079 |
| Number of A&E visits | 0.66 | 0.53, 0.84 | 0.0005 | 0.79 | 0.63, 0.98 | 0.0360 |
| **COPD-related total medical costs** |  |  |  |  |  |  |
| 6 months | 0.70 | 0.55, 0.88 | 0.0022 | 0.78 | 0.60, 1.00 | 0.0500 |
| 12 months | 0.74 | 0.59, 0.92 | 0.0080 | 0.83 | 0.65, 1.04 | 0.1065 |
| 18 months | 0.75 | 0.60, 0.93 | 0.0098 | 0.84 | 0.66, 1.06 | 0.1454 |
| 24 months | 0.76 | 0.61, 0.95 | 0.0137 | 0.84 | 0.66, 1.07 | 0.1578 |
| **All-cause total medical costs** |  |  |  |  |  |  |
| 6 months | 0.75 | 0.65, 0.87 | 0.0001 | 0.79 | 0.67, 0.93 | 0.0037 |
| 12 months | 0.78 | 0.68, 0.89 | 0.0003 | 0.82 | 0.71, 0.95 | 0.0100 |
| 18 months | 0.79 | 0.69, 0.90 | 0.0005 | 0.83 | 0.71, 0.96 | 0.0136 |
| 24 months | 0.79 | 0.69, 0.91 | 0.0007 | 0.82 | 0.71, 0.96 | 0.0123 |

aAt 6 months after indexing.

A&E, Accident and Emergency; CI, confidence interval; COPD, chronic obstructive pulmonary disease; GP, general practitioner; HCRU, healthcare resource utilization**.**

**Supplementary Table 3.** Rate of moderate exacerbations at 6, 12, 18, and 24 months

|  | **Rate (95% CI), per 1,000 persons/day** | | | |
| --- | --- | --- | --- | --- |
| **Unweighted** | | **Weighted** | |
| **UMEC/VI** | **IND/GLY** | **UMEC/VI** | **IND/GLY** |
| 6 months | 0.73 (0.68, 0.78) | 0.80 (0.71, 0.90) | 0.77 (0.71, 0.83) | 0.75 (0.64, 0.85) |
| 12 months | 0.76 (0.72, 0.81) | 0.84 (0.76, 0.92) | 0.80 (0.75, 0.86) | 0.78 (0.69, 0.86) |
| 18 months | 0.77 (0.73, 0.81) | 0.86 (0.79, 0.93) | 0.81 (0.76, 0.86) | 0.81 (0.73, 0.89) |
| 24 months | 0.78 (0.74, 0.82) | 0.86 (0.79, 0.93) | 0.81 (0.77, 0.86) | 0.81 (0.74, 0.88) |

CI, confidence interval; GLY, glycopyrronium; IND, indacaterol; UMEC, umeclidinium; VI, vilanterol.

**Supplementary Table 4.** Rate of severe exacerbations at 6, 12, 18, and 24 months

|  | **Rate (95% CI), per 1,000 persons/day** | | | |
| --- | --- | --- | --- | --- |
| **Unweighted** | | **Weighted** | |
| **UMEC/VI** | **IND/GLY** | **UMEC/VI** | **IND/GLY** |
| 6 months | 0.28 (0.24, 0.31) | 0.49 (0.41, 0.57) | 0.29 (0.25, 0.33) | 0.42 (0.35, 0.50) |
| 12 months | 0.30 (0.27, 0.32) | 0.43 (0.37, 0.49) | 0.32 (0.28, 0.35) | 0.38 (0.32, 0.44) |
| 18 months | 0.31 (0.29, 0.34) | 0.43 (0.37, 0.49) | 0.33 (0.29, 0.36) | 0.38 (0.32, 0.43) |
| 24 months | 0.32 (0.29, 0.35) | 0.44 (0.39, 0.50) | 0.34 (0.31, 0.37) | 0.40 (0.34, 0.46) |

CI, confidence interval; GLY, glycopyrronium; IND, indacaterol; UMEC, umeclidinium; VI, vilanterol

**Supplementary Table 5.** Incidence rate of COPD-related and all-cause HCRU

|  | **HCRU, per person per day** | | | |
| --- | --- | --- | --- | --- |
| **Unweighted** | | **Weighted** | |
| **UMEC/VI** | **IND/GLY** | **UMEC/VI** | **IND/GLY** |
| **6 months** |  |  |  |  |
| **COPD-related HCRU** |  |  |  |  |
| Prescriptions | 0.04 | 0.05 | 0.04 | 0.04 |
| GP consultations | 0.01 | 0.01 | 0.01 | 0.01 |
| Inpatient stays | <0.01 | <0.01 | <0.01 | <0.01 |
| A&E visits | <0.01 | <0.01 | <0.01 | <0.01 |
| **All-cause HCRU** |  |  |  |  |
| Prescriptions | 0.25 | 0.26 | 0.25 | 0.24 |
| GP consultations | 0.03 | 0.04 | 0.03 | 0.04 |
| Inpatient stays | <0.01 | <0.01 | <0.01 | <0.01 |
| A&E visits | <0.01 | <0.01 | <0.01 | <0.01 |
| **12 months** |  |  |  |  |
| **COPD-related HCRU** |  |  |  |  |
| Prescriptions | 0.04 | 0.04 | 0.04 | 0.04 |
| GP consultations | 0.01 | 0.01 | 0.01 | 0.01 |
| Inpatient stays | <0.01 | <0.01 | <0.01 | <0.01 |
| A&E visits | <0.01 | <0.01 | <0.01 | <0.01 |
| **All-cause HCRU** |  |  |  |  |
| Prescriptions | 0.25 | 0.26 | 0.26 | 0.25 |
| GP consultations | 0.03 | 0.04 | 0.03 | 0.04 |
| Inpatient stays | <0.01 | <0.01 | <0.01 | <0.01 |
| A&E visits | <0.01 | <0.01 | <0.01 | <0.01 |
| **18 months** |  |  |  |  |
| **COPD-related HCRU** |  |  |  |  |
| Prescriptions | 0.04 | 0.04 | 0.04 | 0.04 |
| GP consultations | <0.01 | 0.01 | <0.01 | 0.01 |
| Inpatient stays | <0.01 | <0.01 | <0.01 | <0.01 |
| A&E visits | <0.01 | <0.01 | <0.01 | <0.01 |
| **All-cause HCRU** |  |  |  |  |
| Prescriptions | 0.25 | 0.27 | 0.26 | 0.25 |
| GP consultations | 0.03 | 0.04 | 0.03 | 0.04 |
| Inpatient stays | <0.01 | <0.01 | <0.01 | <0.01 |
| A&E visits | <0.01 | <0.01 | <0.01 | <0.01 |
| **24 months** |  |  |  |  |
| **COPD-related HCRU** |  |  |  |  |
| Prescriptions | 0.04 | 0.04 | 0.04 | 0.04 |
| GP consultations | <0.01 | 0.01 | <0.01 | 0.01 |
| Inpatient stays | <0.01 | <0.01 | <0.01 | <0.01 |
| A&E visits | <0.01 | <0.01 | <0.01 | <0.01 |
| **All-cause HCRU** |  |  |  |  |
| Prescriptions | 0.25 | 0.27 | 0.26 | 0.25 |
| GP consultations | 0.03 | 0.04 | 0.03 | 0.04 |
| Inpatient stays | <0.01 | <0.01 | <0.01 | <0.01 |
| A&E visits | <0.01 | <0.01 | <0.01 | <0.01 |

A&E, Accident and Emergency; COPD, chronic obstructive pulmonary disease; GLY, glycopyrronium; GP, general practitioner; HCRU, healthcare resource utilization; IND, indacaterol; UMEC, umeclidinium; VI, vilanterol.

**Supplementary Table 6.** COPD-related and all-cause costs by HCRU element and total costs

|  | **Costs, GBP, mean per person per year (SD)** | | | |
| --- | --- | --- | --- | --- |
| **Unweighted** | | **Weighted** | |
| **UMEC/VI** | **IND/GLY** | **UMEC/VI** | **IND/GLY** |
| **6 months** |  |  |  |  |
| **COPD-related costs** |  |  |  |  |
| Prescriptions | 415.10 (246.81) | 434.20 (334.05) | 420.01 (246.53) | 422.44 (305.74) |
| GP consultations | 74.20 (95.36) | 82.09 (105.74) | 75.98 (96.79) | 77.92 (102.38) |
| Inpatient stays | 569.49 (5,866.31) | 941.93 (6,446.76) | 609.59 (6,101.25) | 886.87 (6,065.10) |
| A&E visits | 15.09 (104.20) | 26.21 (181.52) | 16.40 (110.92) | 19.63 (142.04) |
| **All-cause costs** |  |  |  |  |
| Prescriptions | 717.91 (538.36) | 751.56 (584.23) | 725.98 (545.33) | 732.67 (559.58) |
| GP consultations | 448.97 (448.39) | 481.17 (441.08) | 455.28 (446.00) | 473.96 (431.03) |
| Inpatient stays | 1,585.37 (7,510.98) | 2,447.18 (10,881.37) | 1,619.87 (7,690.67) | 2,390.35 (10,576.77) |
| A&E visits | 84.56 (312.93) | 133.97 (662.85) | 88.08 (321.22) | 117.23 (552.21) |
| **12 months** |  |  |  |  |
| **COPD-related costs** |  |  |  |  |
| Prescriptions | 386.92 (244.02) | 407.54 (333.13) | 392.02 (242.07) | 395.90 (305.96) |
| GP consultations | 67.02 (78.89) | 75.01 (91.48) | 69.32 (81.24) | 71.63 (88.74) |
| Inpatient stays | 675.78 (5,868.12) | 942.14 (6,314.51) | 716.98 (6,069.21) | 847.53 (5,746.32) |
| A&E visits | 16.17 (94.88) | 24.88 (151.64) | 18.01 (102.03) | 18.85 (122.55) |
| **All-cause costs** |  |  |  |  |
| Prescriptions | 696.64 (522.51) | 734.93 (584.80) | 706.30 (530.08) | 713.58 (556.88) |
| GP consultations | 439.11 (416.52) | 472.72 (407.21) | 445.44 (411.85) | 466.78 (403.43) |
| Inpatient stays | 1,824.62 (7,388.66) | 2,507.63 (10,511.80) | 1,882.08 (7,583.20) | 2,434.22 (10,040.55) |
| A&E visits | 93.15 (304.63) | 132.84 (635.73) | 97.84 (315.96) | 118.10 (534.43) |
| **18 months** |  |  |  |  |
| **COPD-related costs** |  |  |  |  |
| Prescriptions | 380.25 (242.27) | 401.74 (332.00) | 385.55 (240.87) | 390.53 (305.46) |
| GP consultations | 64.74 (74.65) | 72.74 (87.35) | 66.87 (76.67) | 70.22 (85.36) |
| Inpatient stays | 737.28 (5,905.21) | 965.93 (6,256.10) | 777.20 (6,104.61) | 882.34 (5,721.68) |
| A&E visits | 16.81 (93.50) | 26.72 (147.31) | 18.78 (100.80) | 21.25 (121.62) |
| **All-cause costs** |  |  |  |  |
| Prescriptions | 695.64 (524.09) | 734.19 (586.92) | 705.51 (531.26) | 713.02 (559.02) |
| GP consultations | 437.65 (400.59) | 471.20 (392.38) | 444.31 (395.63) | 467.46 (391.30) |
| Inpatient stays | 1,950.78 (7,388.06) | 2,598.64 (10,458.60) | 2,008.07 (7,576.27) | 2,549.11 (10,127.19) |
| A&E visits | 97.80 (302.80) | 136.79 (631.16) | 103.31 (316.91) | 123.80 (523.48) |
| **24 months** |  |  |  |  |
| **COPD-related costs** |  |  |  |  |
| Prescriptions | 379.22 (242.16) | 401.47 (332.54) | 384.63 (240.85) | 390.35 (305.78) |
| GP consultations | 64.02 (72.79) | 71.38 (85.00) | 66.14 (74.72) | 69.53 (83.44) |
| Inpatient stays | 775.70 (5,916.92) | 999.06 (6,261.38) | 818.95 (6,116.95) | 911.59 (5,722.95) |
| A&E visits | 17.44 (93.95) | 27.48 (146.88) | 19.68 (102.07) | 22.37 (122.10) |
| **All-cause costs** |  |  |  |  |
| Prescriptions | 698.89 (526.91) | 739.26 (589.31) | 709.05 (534.23) | 717.77 (561.30) |
| GP consultations | 437.94 (392.10) | 469.90 (384.43) | 444.65 (387.22) | 466.03 (382.95) |
| Inpatient stays | 2,028.12 (7,412.01) | 2,654.53 (10,457.53) | 2,087.87 (7,604.19) | 2,601.03 (10,131.99) |
| A&E visits | 100.75 (302.22) | 138.61 (630.04) | 106.17 (316.30) | 125.95 (522.75) |
| **Total COPD-related costs** |  |  |  |  |
| 6 months | 1,071.05 (5,910.99) | 1,484.69 (6,534.29) | 1,118.57 (6,151.07) | 1,408.78 (6,136.55) |
| 12 months | 1,142.80 (5,913.49) | 1,451.04 (6,402.76) | 1,193.26 (6,120.60) | 1,334.97 (5,819.12) |
| 18 months | 1,196.21 (5,951.63) | 1,468.55 (6,344.45) | 1,245.51 (6,156.98) | 1,365.59 (5,796.68) |
| 24 months | 1,233.18 (5,963.85) | 1,500.95 (6,351.49) | 1,286.11 (6,170.30) | 1,394.58 (5,799.35) |
| **Total all-cause costs** |  |  |  |  |
| 6 months | 2,834.86 (7,870.71) | 3,813.79 (11,463.09) | 2,874.75 (7,984.75) | 3,657.96 (11,057.90) |
| 12 months | 3,051.03 (7,763.38) | 3,846.78 (11,102.93) | 3,139.20 (8,004.08) | 3,672.28 (10,133.37) |
| 18 months | 3,179.28 (7,768.13) | 3,939.37 (11,050.75) | 3,257.13 (7,976.34) | 3,854.78 (10,528.70) |
| 24 months | 3,262.97 (7,793.71) | 4,000.64 (11,052.59) | 3,353.10 (8,036.74) | 3,853.65 (10,141.58) |

A&E, Accident and Emergency; COPD, chronic obstructive pulmonary disease; GBP, British Pound Sterling; GLY, glycopyrronium; GP, general practitioner; HCRU, healthcare resource utilization;
IND, indacaterol; SD, standard deviation; UMEC, umeclidinium; VI, vilanterol.

**Supplementary Figure 1.** Kaplan–Meier plots of time-to-first on-treatment A) moderate-to-severe, B) moderate, and C) severe exacerbation


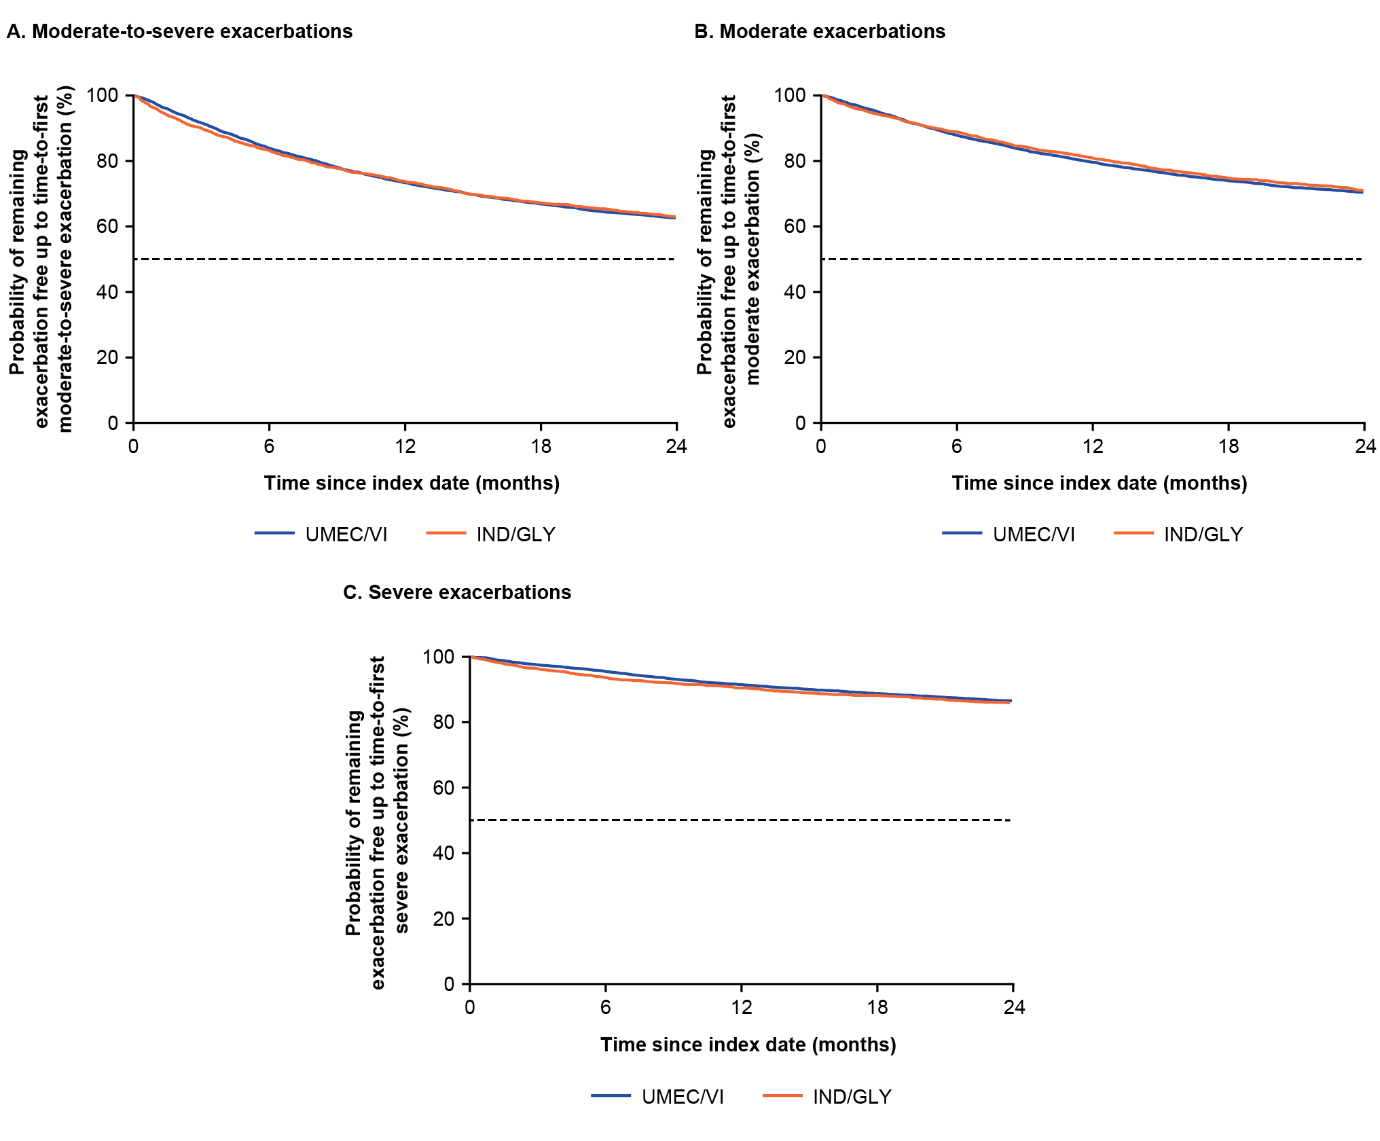


Dashed line indicates median survival (the point at which half of patients had experienced an
on-treatment exacerbation).

GLY, glycopyrronium; IND, indacaterol; UMEC, umeclidinium; VI, vilanterol.

**Supplementary Figure 2.** Kaplan–Meier survival analysis and survival functions for time-to-triple therapy


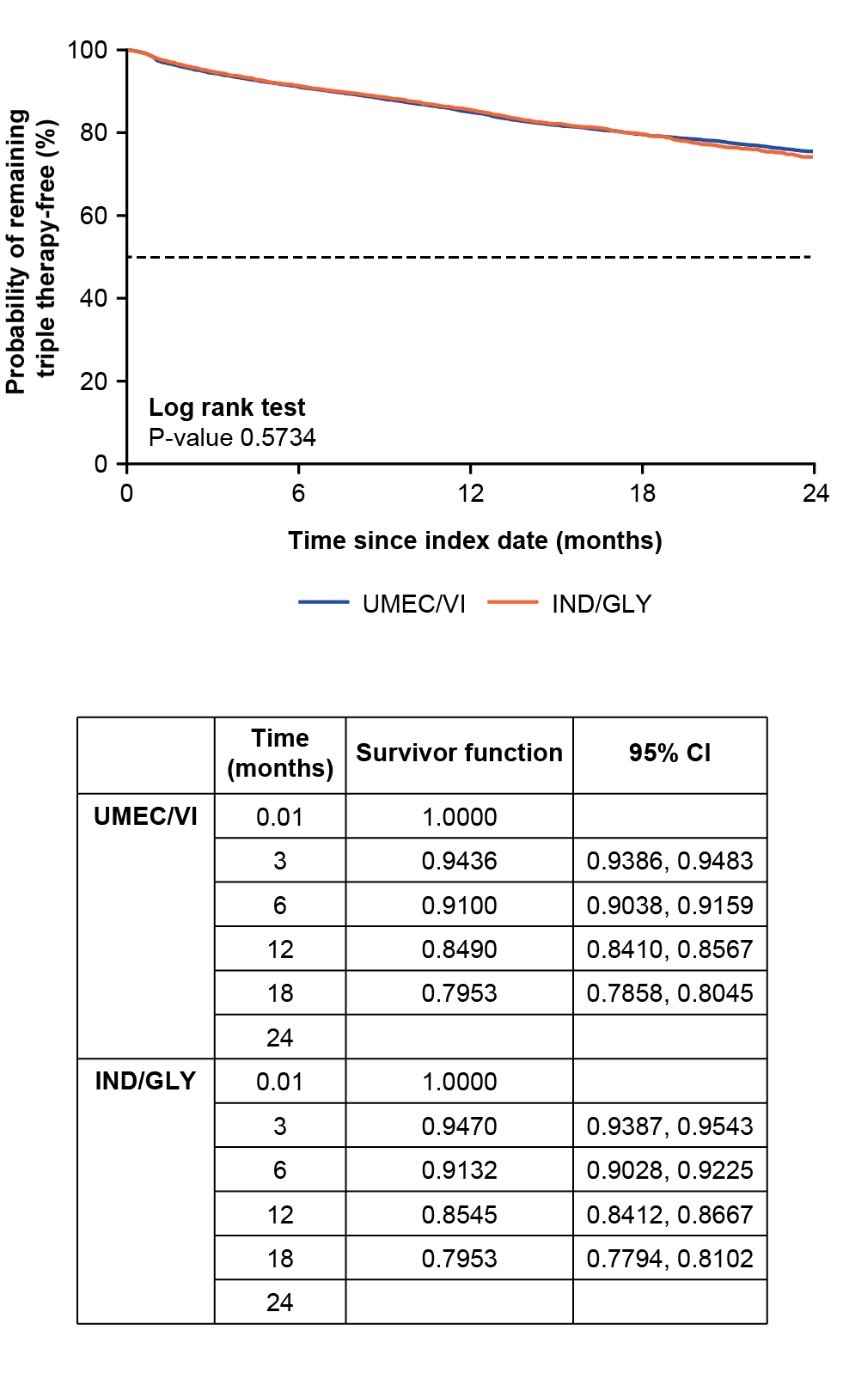


Dashed line indicates median survival (the point at which half of patients had undergone triple therapy).

CI, confidence interval; GLY, glycopyrronium; IND, indacaterol; UMEC, umeclidinium; VI, vilanterol.
